# Supplementary material for: Safety, efficacy and pharmacokinetic evaluations of a new coated chloroquine tablet in a single-arm open-label non-comparative trial in Brazil: a step towards a user-friendly malaria vivax treatment
Source: PubMed Central journal article supplement (PMC5027105; doi:10.1186/s12936-016-1530-0), 2016-09-17
Supplement: 12936_2016_1530_MOESM1_ESM.pdf [file 12936_2016_1530_MOESM1_ESM.pdf]

Frente

farmanguinhos cloroquina e primaquina  
**difosfato de cloroquina (150 mg) e  
difosfato de primaquina (15 mg)**

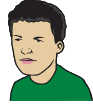

15 ANOS OU MAIS  
(50 kg ou mais)

USO ORAL  
EXIJA A BULA

Para oito dias de tratamento

1º DIA: 6 comprimidos (3 de cloroquina, 3 de primaquina)

2º DIA: 5 comprimidos (3 de cloroquina, 2 de primaquina)

3º DIA: 4 comprimidos (2 de cloroquina, 2 de primaquina)

4º DIA: 2 comprimidos (1 de cloroquina, 1 de primaquina)

5º DIA: 2 comprimidos (1 de cloroquina, 1 de primaquina)

6º DIA: 2 comprimidos (1 de cloroquina, 1 de primaquina)

7º DIA: 2 comprimidos (1 de cloroquina, 1 de primaquina)

8º DIA: 2 comprimidos (1 de cloroquina, 1 de primaquina)

Contém 9 comprimidos de cloroquina e 16 comprimidos de primaquina

TOMAR OS COMPRIMIDOS COM LÍQUIDOS

PROIBIDA A VENDA

DISQUE SAÚDE **136**

USO SOB PRESCRIÇÃO MÉDICA

SUS Ministério da Saúde Governo Federal

Verso

Reserva de ventiz

Lote do Conjunto: xxxxxx

Val.: do Conjunto: xxxxxx

Fab. do Conjunto: xxxxxx

SAC@fat.fiocruz.br

SAC 0800 024 1692

Indústria Brasileira

M 5.XXXXX.XXXX.XXX-X

Farm. Resp.: Carlos Araújo da Costa - CRF-RJ N.º 2809

Av. Comandante Guarany, 447 - Rio de Janeiro - RJ

Fabricado por: INSTITUTO DE TECNOLOGIA EM FÁRMACOS/FARMANGUINHOS

Av. Brasil, 4365

CNPJ: 33.781.055/0001-35

Registrado por: FUNDAÇÃO OSWALDO CRUZ

de primaquina, correspondente a 15 mg de primaquina base.

Cada comprimido de primaquina contém 26,3 mg de difosfato

150 mg de cloroquina base.

Composição: Cada comprimido revestido de cloroquina

contém 214,91 mg de difosfato de cloroquina, correspondente a

150 mg de cloroquina base.

Informações ao Paciente, Indicações, Contraindicações

e Precauções: Vide Bula.

Proteger da luz e umidade.

Conservar em temperatura ambiente (15 a 30 °C).

TODO MEDICAMENTO DEVE SER MANTIDO FORA DO ALCANCE DAS CRIANÇAS

Frente

farmanguinhos cloroquina e primaquina  
**difosfato de cloroquina (150 mg) e  
difosfato de primaquina (15 mg)**

15 ANOS OU MAIS  
(50 kg ou mais)

USO ORAL  
EXIJA A BULA

Para oito dias de tratamento

1º DIA: 6 comprimidos (3 de cloroquina, 3 de primaquina)

2º DIA: 5 comprimidos (3 de cloroquina, 2 de primaquina)

3º DIA: 4 comprimidos (2 de cloroquina, 2 de primaquina)

4º DIA: 2 comprimidos (1 de cloroquina, 1 de primaquina)

5º DIA: 2 comprimidos (1 de cloroquina, 1 de primaquina)

6º DIA: 2 comprimidos (1 de cloroquina, 1 de primaquina)

7º DIA: 2 comprimidos (1 de cloroquina, 1 de primaquina)

8º DIA: 2 comprimidos (1 de cloroquina, 1 de primaquina)

Contém 9 comprimidos de cloroquina e 16 comprimidos de primaquina

TOMAR OS COMPRIMIDOS COM LÍQUIDOS

PROIBIDA A VENDA

DISQUE SAÚDE **136**

USO SOB PRESCRIÇÃO MÉDICA

SUS Ministério da Saúde Governo Federal

Verso

Nome do Paciente: \_\_\_\_\_

TUDO MEDICAMENTO DEVE SER MANTIDO FORA DO ALCANCE DAS CRIANÇAS

Conservar em temperatura ambiente (15 a 30 °C).  
Proteger da luz e umidade.

Informações ao Paciente, Indicações, Contraindicações  
e Precauções: Vide Bula.

Composição: Cada comprimido revestido de Cloroquina  
contém 214,91 mg de difosfato de cloroquina, correspondente a  
150 mg de cloroquina base.  
Cada comprimido de primaquina contém 26,3 mg de difosfato  
de primaquina, correspondente a 15 mg de primaquina base.

Registrado por: FUNDAÇÃO OSWALDO CRUZ  
CNPJ: 33.781.055/0001-35

Fabricado por: INSTITUTO DE TECNOLOGIA EM FÁRMACOS/FARMANGUINHOS  
Av. Comandante Guarany, 447 - Rio de Janeiro - RJ  
Farm. Resp.: Carlos Araújo da Costa - CRF-RJ N.º 2809

M 5.XXXXX.XXXX.XXX-X

Indústria Brasileira

SAC 0800 024 1692

SAC@fat.fiocruz.br

Fab. do Conjunto: xxxxxx

Val.: do Conjunto: xxxxxx

Lote do Conjunto: xxxxxx

Frente

farmanguinhos cloroquina e primaquina  
**difosfato de cloroquina 150 mg e difosfato de primaquina 15 mg**

**USO ORAL**  
 EXIJA A BULA

**12 A 14 ANOS**  
 (35 a 49 kg)

**Para oito dias de tratamento**

1º DIA  
2º DIA  
3º DIA  
4º DIA  
5º DIA  
6º DIA  
7º DIA  
8º DIA

Contém 7 comprimidos de cloroquina e 11 comprimidos de primaquina

**TOMAR OS COMPRIMIDOS COM LÍQUIDOS**

PROIBIDA A VENDA

DISQUE SAÚDE **136**

**USO SOB PRESCRIÇÃO MÉDICA**

SUS Ministério da Saúde Governo Federal

Verso

Reserve de venviz

Lote do Conjunto: xxxxxx  
 Val.: do Conjunto: xxxxxx  
 Fab. do Conjunto: xxxxxx

sac@far.fiocruz.br  
 SAC 0800 024 1692  
 Indústria Brasileira

M 5 X.XXXX.XXXX.XXX-X

Registado por: FUNDAÇÃO OSWALDO CRUZ  
 CNPJ: 33.781.055/0001-35  
 Av. Brasil, 4365  
 FARMANGUINHOS/FARMACOS/FARMANGUINHOS  
 Av. Comandante Guarany, 447 - Rio de Janeiro RJ  
 Farm. Resp.: Carlos Araújo da Costa - CRF-RJ N° 2809

Composição: Cada comprimido revestido de cloroquina contém 214,91 mg de difosfato de cloroquina, correspondente a 150 mg de cloroquina base. Cada comprimido de primaquina contém 26,3 mg de difosfato de primaquina, correspondente a 15 mg de primaquina base.

Informações ao Paciente, Indicações, Contraindicações e Precauções: Vide Bula.

Proteger da luz e umidade. (15 a 30 °C).

Conservar em temperatura ambiente (15 a 30 °C).

TODO MEDICAMENTO DEVE SER MANTIDO FORA DO ALCANCE DAS CRIANÇAS

Frente

farmanguinhos cloroquina e primaquina  
**difosfato de cloroquina 150 mg e difosfato de primaquina 15 mg**

**USO ORAL**  
 EXIJA A BULA

**12 A 14 ANOS**  
 (35 a 49 kg)

**Para oito dias de tratamento**

1º DIA  
2º DIA  
3º DIA  
4º DIA  
5º DIA  
6º DIA  
7º DIA  
8º DIA

Contém 7 comprimidos de cloroquina e 11 comprimidos de primaquina

**TOMAR OS COMPRIMIDOS COM LÍQUIDOS**

PROIBIDA A VENDA

DISQUE SAÚDE **136**

**USO SOB PRESCRIÇÃO MÉDICA**

SUS Ministério da Saúde Governo Federal

Verso

Nome do Paciente: \_\_\_\_\_

TODO MEDICAMENTO DEVE SER MANTIDO FORA DO ALCANCE DAS CRIANÇAS

Conservar em temperatura ambiente (15 a 30 °C). Proteger da luz e umidade.

Informações ao Paciente, Indicações, Contraindicações e Precauções: Vide Bula.

Composição: Cada comprimido revestido de cloroquina contém 214,91 mg de difosfato de cloroquina, correspondente a 150 mg de cloroquina base. Cada comprimido de primaquina contém 26,3 mg de difosfato de primaquina, correspondente a 15 mg de primaquina base.

Registado por: FUNDAÇÃO OSWALDO CRUZ  
 CNPJ: 33.781.055/0001-35  
 Av. Brasil, 4365  
 FARMANGUINHOS/FARMACOS/FARMANGUINHOS  
 Av. Comandante Guarany, 447 - Rio de Janeiro - RJ  
 Farm. Resp.: Carlos Araújo da Costa - CRF-RJ N° 2809

M 5 X.XXXX.XXXX.XXX-X

Indústria Brasileira  
 SAC 0800 024 1692  
 sac@far.fiocruz.br

Fab. do Conjunto: xxxxxx  
 Val.: do Conjunto: xxxxxx  
 Lote do Conjunto: xxxxxx

Frente

farmanguinhos cloroquina e primaquina  
**difosfato de cloroquina (150 mg) e difosfato de primaquina (15 mg)**

**USO ORAL**  
EXIJA A BULA

9 A 11 ANOS  
(25 a 34 kg)

Para oito dias de tratamento

1º DIA  
2º DIA  
3º DIA  
4º DIA  
5º DIA  
6º DIA  
7º DIA  
8º DIA

Contém 6 comprimidos de cloroquina e 8 comprimidos de primaquina

TOMAR OS COMPRIMIDOS COM LÍQUIDOS

DISQUE SAÚDE  
**136**

PROIBIDA A VENDA

USO SOB PRESCRIÇÃO MÉDICA

SUS Ministério da Saúde Governo Federal

Reservado de venâiz

Lote do Conjunto: xxxxx  
Val.: do Conjunto: xxxxx  
Fab. do Conjunto: xxxxxx

SAC 0800 024 1692  
sac@far.fiocruz.br

Indústria Brasileira

M 5 X.XXXX.XXXX.XXX-X

Farm. Resp.: Carlos Araújo da Costa - (CRF-RJ) N.º 2809  
Av. Comandante Guarany, 447 - Rio de Janeiro - RJ

Fabricado por: INSTITUTO DE TECNOLOGIA EM FARMACOS/FARMANGUINHOS  
Av. Brasil, 4365  
CNPJ: 33.781.055/0001-35

Registrado por: FUNDAÇÃO OSWALDO CRUZ  
Cada comprimido de primaquina contém 15 mg de primaquina base.  
Cada comprimido de primaquina contém 26,3 mg de difosfato de primaquina, correspondente a 15 mg de primaquina base.  
150 mg de cloroquina base.  
Cada comprimido revestido de cloroquina contém 214,91 mg de difosfato de cloroquina, correspondente a 150 mg de cloroquina base.

Composição: Cada comprimido revestido de cloroquina contém 214,91 mg de difosfato de cloroquina, correspondente a 150 mg de cloroquina base.  
Cada comprimido de primaquina contém 26,3 mg de difosfato de primaquina, correspondente a 15 mg de primaquina base.

Informações ao Paciente, Indicações, Contraindicações e Precauções: Vide Bula.

Proteger da luz e umidade.  
Conservar em temperatura ambiente (15 a 30 °C).

TODO MEDICAMENTO DEVE SER MANTIDO FORA DO ALCANCE DAS CRIANÇAS

Verso

Frente

farmanguinhos cloroquina e primaquina  
**difosfato de cloroquina (150 mg) e difosfato de primaquina (15 mg)**

**USO ORAL**  
EXIJA A BULA

9 A 11 ANOS  
(25 a 34 kg)

Para oito dias de tratamento

1º DIA  
2º DIA  
3º DIA  
4º DIA  
5º DIA  
6º DIA  
7º DIA  
8º DIA

Contém 6 comprimidos de cloroquina e 8 comprimidos de primaquina

TOMAR OS COMPRIMIDOS COM LÍQUIDOS

DISQUE SAÚDE  
**136**

PROIBIDA A VENDA

USO SOB PRESCRIÇÃO MÉDICA

SUS Ministério da Saúde Governo Federal

Verso

Nome do Paciente: \_\_\_\_\_

TODO MEDICAMENTO DEVE SER MANTIDO FORA DO ALCANCE DAS CRIANÇAS

1º DIA  
2º DIA  
3º DIA  
4º DIA  
5º DIA  
6º DIA  
7º DIA  
8º DIA

Conservar em temperatura ambiente (15 a 30 °C).  
Proteger da luz e umidade.  
Informações ao Paciente, Indicações, Contraindicações e Precauções: Vide Bula.

Composição: Cada comprimido revestido de Cloroquina contém 214,91 mg de difosfato de cloroquina, correspondente a 150 mg de cloroquina base.  
Cada comprimido de primaquina contém 26,3 mg de difosfato de primaquina, correspondente a 15 mg de primaquina base.

Registrado por: FUNDAÇÃO OSWALDO CRUZ  
CNPJ: 33.781.055/0001-35  
Av. Brasil, 4365  
Fabricado por: INSTITUTO DE TECNOLOGIA EM FARMACOS/FARMANGUINHOS  
Av. Comandante Guarany, 447 - Rio de Janeiro - RJ  
Farm. Resp.: Carlos Araújo da Costa - (CRF-RJ) N.º 2809

M 5 X.XXXX.XXXX.XXX-X

Indústria Brasileira  
SAC 0800 024 1692  
sac@far.fiocruz.br

Fab. do Conjunto: xxxxxx  
Val.: do Conjunto: xxxxxx  
Lote do Conjunto: xxxxxx

Frente

Verso

farmanguinhos cloroquina e primaquina  
**difosfato de cloroquina (150 mg) e difosfato de primaquina (5 mg)**

**USO ORAL**  
EXIJA A BULA

 **4 A 8 ANOS**  
(15 a 24 kg) **Para oito dias de tratamento**

**1º DIA**

**2º DIA**

**3º DIA**

Contém 3 comprimidos de cloroquina e 16 comprimidos de primaquina

**TOMAR OS COMPRIMIDOS COM LÍQUIDOS**

PROIBIDA A VENDA

DISQUE SAÚDE **136**

**USO SOB PRESCRIÇÃO MÉDICA**

 **Ministério da Saúde** **Governo Federal**

**4º DIA**

**5º DIA**

**6º DIA**

**7º DIA**

**8º DIA**

Contém 3 comprimidos de cloroquina e 16 comprimidos de primaquina

**TOMAR OS COMPRIMIDOS COM LÍQUIDOS**

PROIBIDA A VENDA

DISQUE SAÚDE **136**

**USO SOB PRESCRIÇÃO MÉDICA**

 **Ministério da Saúde** **Governo Federal**

---

Reserva de ventiz

Lote do Conjunto: xxxxxx

Val.: do Conjunto: xxxxxx

Fab. do Conjunto: xxxxxx

Indústria Brasileira

SAC 0800 024 1692

sac@inf.froczuz.br

M 5 X.XXXX.XXXX.XXX-X

Farm. Resp.: Carlos Araújo da Costa - CRF-RJ N° 2809

Av. Comandante Guarany, 447 - Rio de Janeiro - RJ

Fabricado por: INSTITUTO DE TECNOLOGIA EM FÁRMACOS/FARMANGUINHOS

Av. Brasil, 4365

CNPJ: 33.781.055/0001-35

Registrado por: FUNDACÃO OSWALDO CRUZ

de primaquina, correspondente a 5 mg de primaquina base.

Cada comprimido de primaquina contém 8 mg de difosfato

150 mg de cloroquina base.

Composição: Cada comprimido revestido de cloroquina contém 214,91 mg de difosfato de cloroquina, correspondente a

150 mg de cloroquina base.

Cada comprimido de primaquina contém 26,3 mg de difosfato de primaquina, correspondente a 15 mg de primaquina base.

Registrado por: FUNDACÃO OSWALDO CRUZ

CNPJ: 33.781.055/0001-35

Av. Brasil, 4365

Fabricado por: INSTITUTO DE TECNOLOGIA EM FÁRMACOS/FARMANGUINHOS

Av. Comandante Guarany, 447 - Rio de Janeiro - RJ

Farm. Resp.: Carlos Araújo da Costa - CRF-RJ N° 2809

M 5 X.XXXX.XXXX.XXX-X

Indústria Brasileira

SAC 0800 024 1692

sac@inf.froczuz.br

Fab. do Conjunto: xxxxxx

Val.: do Conjunto: xxxxxx

Lote do Conjunto: xxxxxx

2014.01.01.00.00

TUDO MEDICAMENTO DEVE SER MANTIDO FORA DO ALCANCE DAS CRIANÇAS

Frente

Verso

farmanguinhos cloroquina e primaquina  
**difosfato de cloroquina (150 mg) e difosfato de primaquina (5 mg)**

**USO ORAL**  
EXIJA A BULA

 **4 A 8 ANOS**  
(15 a 24 kg) **Para oito dias de tratamento**

**1º DIA**

**2º DIA**

**3º DIA**

Contém 3 comprimidos de cloroquina e 16 comprimidos de primaquina

**TOMAR OS COMPRIMIDOS COM LÍQUIDOS**

PROIBIDA A VENDA

DISQUE SAÚDE **136**

**USO SOB PRESCRIÇÃO MÉDICA**

 **Ministério da Saúde** **Governo Federal**

**4º DIA**

**5º DIA**

**6º DIA**

**7º DIA**

**8º DIA**

Contém 3 comprimidos de cloroquina e 16 comprimidos de primaquina

**TOMAR OS COMPRIMIDOS COM LÍQUIDOS**

PROIBIDA A VENDA

DISQUE SAÚDE **136**

**USO SOB PRESCRIÇÃO MÉDICA**

 **Ministério da Saúde** **Governo Federal**

Nome do Paciente: \_\_\_\_\_

TUDO MEDICAMENTO DEVE SER MANTIDO FORA DO ALCANCE DAS CRIANÇAS

**1º DIA**

**2º DIA**

**3º DIA**

**4º DIA**

**5º DIA**

**6º DIA**

**7º DIA**

**8º DIA**

Conservar em temperatura ambiente (15 a 30 °C).  
Proteger da luz e umidade.

Informações ao Paciente, Indicações, Contraindicações e Precauções: Vide Bula.

Composição: Cada comprimido revestido de Cloroquina contém 214,91 mg de difosfato de cloroquina, correspondente a 150 mg de cloroquina base.  
Cada comprimido de primaquina contém 26,3 mg de difosfato de primaquina, correspondente a 15 mg de primaquina base.

Registrado por: FUNDACÃO OSWALDO CRUZ  
CNPJ: 33.781.055/0001-35  
Av. Brasil, 4365  
Fabricado por: INSTITUTO DE TECNOLOGIA EM FÁRMACOS/FARMANGUINHOS  
Av. Comandante Guarany, 447 - Rio de Janeiro - RJ  
Farm. Resp.: Carlos Araújo da Costa - CRF-RJ N° 2809

M 5 X.XXXX.XXXX.XXX-X

Indústria Brasileira

SAC 0800 024 1692

sac@inf.froczuz.br

Fab. do Conjunto: xxxxxx

Val.: do Conjunto: xxxxxx

Lote do Conjunto: xxxxxx

2014.01.01.00.00
