# Supplementary material for: Safety, efficacy and pharmacokinetic evaluations of a new coated chloroquine tablet in a single-arm open-label non-comparative trial in Brazil: a step towards a user-friendly malaria vivax treatment
Source: PubMed Central journal article supplement (PMC5027105; doi:10.1186/s12936-016-1530-0), 2016-09-17
Supplement: 12936_2016_1530_MOESM2_ESM.pdf [file 12936_2016_1530_MOESM2_ESM.pdf]

## Treatment schedule

### Number of tablets per drug per day

| Weight (kg)      | 1 <sup>st</sup> Day |       | 2 <sup>nd</sup> Day |       | 3 <sup>rd</sup> Day |       | 4 <sup>th</sup> to 7 <sup>th</sup> Days | 8 <sup>th</sup> Day | 9 <sup>th</sup> Day |
|------------------|---------------------|-------|---------------------|-------|---------------------|-------|-----------------------------------------|---------------------|---------------------|
|                  | Cq*                 | Pq*   | Cq                  | Pq    | Cq                  | Pq    | Pq 15 mg                                | Pq                  | Pq                  |
|                  | 150 mg              | 15 mg | 150 mg              | 15 mg | 150 mg              | 15 mg |                                         | 15 mg               | 15 mg               |
| <b>≥ 50 - 69</b> | 4                   | 2     | 3                   | 2     | 3                   | 2     | 2                                       | 0                   | 0                   |
| <b>70-79</b>     | 4                   | 2     | 3                   | 2     | 3                   | 2     | 2                                       | 2                   | 0                   |
| <b>80-90</b>     | 4                   | 2     | 3                   | 2     | 3                   | 2     | 2                                       | 2                   | 2                   |

\*Cq=Chloroquine; Pq=Primaquine
