# Supplementary material for: Safety, efficacy and pharmacokinetic evaluations of a new coated chloroquine tablet in a single-arm open-label non-comparative trial in Brazil: a step towards a user-friendly malaria vivax treatment
Source: Malar J. 2016 Sep 17;15:477. doi: 10.1186/s12936-016-1530-0 (PMC5027105; doi:10.1186/s12936-016-1530-0)
Supplement: Supplementary file 4 — 10.1186/s12936-016-1530-0 Adverse events counts reported per day. The table provides detailed information on the absolute numbers and distribution of adverse events during the study. [file 12936_2016_1530_MOESM4_ESM.pdf]

Menstrual cramps  
 Lip swelling  
 Acrocyanosis  
 Afta labial  
 Depression  
 Toothache  
 Extremities swelling  
 Gingival swelling  
 Fever  
 Tingling in hands  
 Photosensitivity  
 Bruise on ankle  
 Hyperglycemia  
 Hypertension  
 Lip injury  
 Nocturia  
 Paresthesia of the lower lip  
 Loss of balance  
 1st degree burn  
 Cold  
 Dryness of the vaginal membrane  
  
 Rhinitis  
 Blurred vision  
**Total**

|    |     |     |    |   |   |   |    |   |   |   |   |    |   |   |   |   |   |   |   |   |   |   |   |     |
|----|-----|-----|----|---|---|---|----|---|---|---|---|----|---|---|---|---|---|---|---|---|---|---|---|-----|
|    |     |     |    |   |   |   |    |   |   |   | 1 |    |   | 1 |   |   |   |   |   |   |   |   |   | 2   |
|    | 1   |     |    |   |   |   | 1  |   |   |   |   |    |   |   |   |   |   |   |   |   |   |   |   | 2   |
|    |     |     |    |   |   |   |    |   |   |   | 1 |    |   |   |   |   |   |   |   |   |   |   |   | 1   |
|    |     |     | 2  |   |   |   |    |   |   |   |   |    |   |   |   |   |   |   |   |   |   |   |   | 1   |
|    |     |     |    |   |   | 1 |    |   |   |   |   |    |   |   |   |   |   |   |   |   |   |   |   | 1   |
|    |     |     |    |   |   |   |    |   |   |   | 1 |    |   |   |   |   |   |   |   |   |   |   |   | 1   |
|    |     |     |    |   |   |   |    |   |   |   |   |    |   |   |   |   | 1 |   |   |   |   |   |   | 1   |
|    |     |     |    |   |   | 1 |    |   |   |   |   |    |   |   |   |   |   |   |   |   |   |   |   | 1   |
|    | 1   |     |    |   |   |   |    |   |   |   |   |    |   |   |   |   |   |   |   |   |   |   |   | 1   |
|    |     |     | 1  |   |   |   |    |   |   |   |   |    |   |   |   |   |   |   |   |   |   |   |   | 1   |
|    |     |     | 1  |   |   |   |    |   |   |   |   |    |   |   |   |   |   |   |   |   |   |   |   | 1   |
| 1  |     |     |    |   |   |   |    |   |   |   |   |    |   |   |   |   |   |   |   |   |   |   |   | 1   |
|    |     |     |    |   |   |   | 1  |   |   |   |   |    |   |   |   |   |   |   |   |   |   |   |   | 1   |
|    |     |     | 1  |   |   |   |    |   |   |   |   |    |   |   |   |   |   |   |   |   |   |   |   | 1   |
|    |     |     |    |   |   | 1 |    |   |   |   |   |    |   |   |   |   |   |   |   |   |   |   |   | 1   |
|    |     |     |    |   |   |   |    |   |   |   |   |    |   |   |   |   |   |   |   |   |   |   |   | 1   |
|    |     |     | 1  |   |   |   |    |   |   |   |   |    |   |   |   |   |   |   |   |   |   |   |   | 1   |
|    |     |     |    |   |   |   |    |   |   |   |   |    |   |   |   |   |   |   |   | 1 |   |   |   | 1   |
|    |     |     | 1  |   |   |   |    |   |   |   |   |    |   |   |   |   |   |   |   |   |   |   |   | 1   |
|    |     |     |    |   |   |   |    |   |   |   |   |    |   |   |   |   |   |   |   |   |   |   |   | 1   |
|    |     |     |    |   |   |   | 1  |   |   |   |   |    |   |   |   |   |   |   |   |   |   |   |   | 1   |
| 15 | 100 | 108 | 59 | 2 | 2 | 5 | 33 | 4 | 2 | 1 | 8 | 12 | 1 | 1 | 2 | 6 | 8 | 1 | 1 | 5 | 2 | 1 | 1 | 380 |
